# Supplementary material for: In Vivo Behavior of the Tandem Glycine Riboswitch in Bacillus subtilis
Source: PubMed Central journal article supplement (PMC5666159; doi:10.1128/mbio.01602-17), 2017-10-31
Supplement: mbo005173565s1.pdf [file mbo005173565s1.pdf]

## 1 SUPPLEMENTAL MATERIALS AND METHODS

2 **Growth curves with varying glucose concentrations.** *B. subtilis* NCIB 3610 starter  
3 cultures were prepared as described and used to inoculate 0.5 mL M9 minimal medium  
4 +/- 0.25% glycine cultures with varying glucose concentrations (0%, 0.2%, 0.4%, 0.6%,  
5 0.8%, and 1% w/v glucose) in sterile non-treated 24-well cell culture plates to a starting  
6 OD<sub>600</sub> reading of approximately 0.2. Plates were incubated at 37°C with shaking (225  
7 rpm) for approximately 24 hours. OD<sub>600</sub> values were recorded at time points indicated  
8 using a SpectraMax M3 Multi-Mode Microplate Reader (Molecular Devices). For further  
9 analysis, select *B. subtilis* NCIB 3610 strains were patched onto the following plates  
10 (1.5% agar): M9 minimal medium + no carbon source, M9 minimal medium + 1%  
11 glucose, M9 minimal medium + 0.25% glycine, and M9 minimal medium + 1% glucose +  
12 0.25% glycine. Plates were incubated at 37°C for one week and photographs were  
13 taken using a Samsung WB380F digital camera.
