# Supplementary material for: In Vivo Behavior of the Tandem Glycine Riboswitch in Bacillus subtilis
Source: PubMed Central journal article supplement (PMC5666159; doi:10.1128/mbio.01602-17), 2017-10-31

**A****0% Glycine**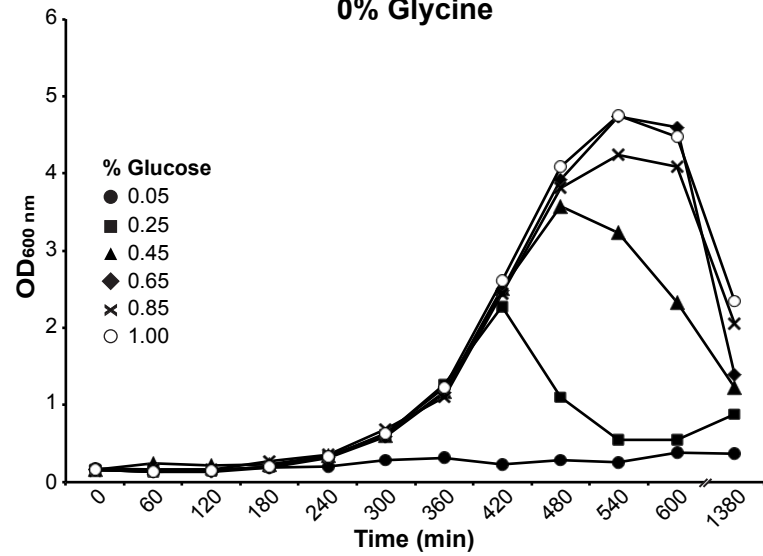**0.25% Glycine**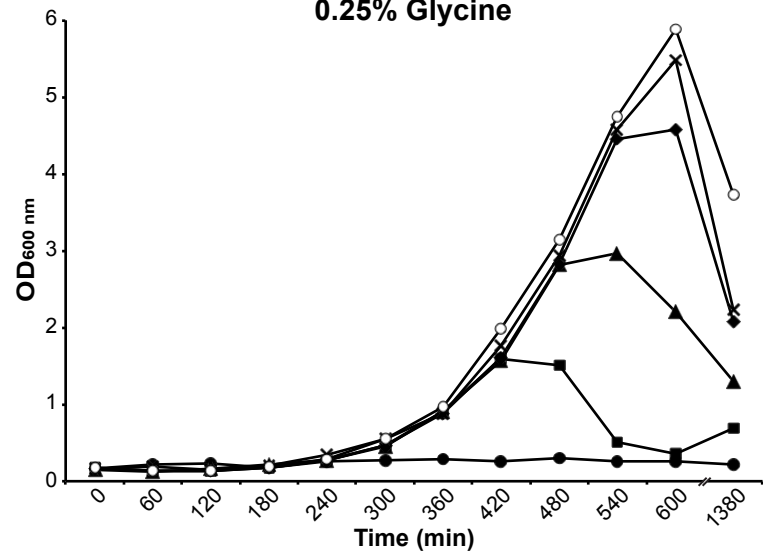**B**

no carbon source

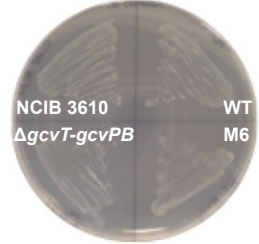

1% glucose

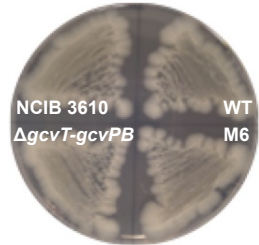

0.25% glycine

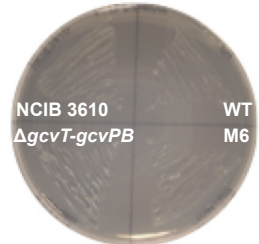

1% glucose + 0.25% glycine

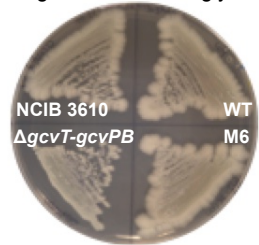

Supplement: mbo005173565sf1.pdf [file mbo005173565sf1.pdf]
