# Supplementary material for: In Vivo Behavior of the Tandem Glycine Riboswitch in Bacillus subtilis
Source: PubMed Central journal article supplement (PMC5666159; doi:10.1128/mbio.01602-17), 2017-10-31
Supplement: mbo005173565st1.pdf [file mbo005173565st1.pdf]

**Table S1.** Oligonucleotides used in this study.

| <b>Name</b> | <b>Sequence (5'-3')</b>                                                  | <b>Notes</b>                                                                                                |
|-------------|--------------------------------------------------------------------------|-------------------------------------------------------------------------------------------------------------|
| 1018        | GGGCCC <b>GAATTC</b> CTGTTGCCCAGCATA<br>TAGTGATGATGGTA                   | Primer for cloning glycine riboswitch into modified pDG1728 reporter vector; EcoRI restriction site in bold |
| 1019        | CCGGCC <b>GGATCC</b> GTCAAATAACGGCGT<br>TCTTTTCAGCAT                     | Primer for cloning glycine riboswitch into modified pDG1728 reporter vector; BamHI restriction site in bold |
| 204         | TATCTCTTGCCAGTCACGTTACG                                                  | Primer for PCR checks and sequencing of pDG1728 reporter constructs                                         |
| 122         | GGGACGACGACAGTATCGGCCTC                                                  | Primer for PCR checks and sequencing of pDG1728 reporter constructs                                         |
| 1014        | TGACAAGATCATATGGGATAGACAG                                                | Primer for amplifying 5'-500 bp region of glycine riboswitch recombinant construct                          |
| 1015        | CTTTAGGGTTATCGAATTCGATAAGCTT<br>CTACAATTTGGGCAGATTTTTCTTATATT<br>ATTCATC | Primer for amplifying 5'-500 bp region of glycine riboswitch recombinant construct                          |
| 1016        | TAGCGCCTACGGGGAATTTGTATCGCG<br>GCCGCTGTTGCCCAGCATATAGTGAT<br>GATGGTAGG   | Primer for amplifying 3'-500 bp region of glycine riboswitch recombinant construct                          |
| 1017        | TCGCTGTATATTGAGCACGGCCTGG                                                | Primer for amplifying 3'-500 bp region of glycine riboswitch recombinant construct                          |
| 681         | TAGAAGCTTATCGAATTCGATAACCCTA<br>AAG                                      | Primer for amplifying erythromycin resistance cassette from pDG1663                                         |
| 682         | GCGGCCGCGATACAAATTAAGTAGG<br>CG                                          | Primer for amplifying erythromycin resistance cassette from pDG1663                                         |
| 1046        | CGAGCTTCCGGACAAATTCATAGTTC                                               | Primer for confirming genomic integration of recombinant constructs                                         |
| 1047        | GAAGCATTAATGACAAGCAGATAGCG                                               | Primer for confirming genomic integration of recombinant constructs                                         |
| 745         | GCAATGAAACACGCCAAAGTAAAC                                                 | Primer for PCR checks, sequencing recombinant glycine riboswitch constructs                                 |
| 1648        | CTGCGGAGTGAATCTCACAGGCAAAG<br>AACTC                                      | Mutagenesis primer for M1, glycine-binding mutation to first aptamer                                        |

|      |                                                             |                                                                                                                                                                                                              |
|------|-------------------------------------------------------------|--------------------------------------------------------------------------------------------------------------------------------------------------------------------------------------------------------------|
| 1649 | GAGTTCTTTTGCCTGTGAGATTCACTCC<br>GCAG                        | Mutagenesis primer for M1,<br>glycine-binding mutation to first<br>aptamer                                                                                                                                   |
| 1650 | GCAAAGTAACTTACAGGTGCCAGGAC<br>AGAG                          | Mutagenesis primer for M2,<br>glycine-binding mutation to<br>second aptamer                                                                                                                                  |
| 1651 | CTCTGTCCTGGCACCTGTAAGTTTACTT<br>TGC                         | Mutagenesis primer for M2,<br>glycine-binding mutation to<br>second aptamer                                                                                                                                  |
| 1263 | GCAAAGTAACTTACAGGTGCCAGGAC<br>AAAAGAAC                      | Mutagenesis primer for M3,<br>dimerization mutation to first<br>aptamer                                                                                                                                      |
| 1264 | GTTCTTTTGCCTGAGAGGTTCACTCCGC<br>AGTTTGC                     | Mutagenesis primer for M3,<br>dimerization mutation to first<br>aptamer                                                                                                                                      |
| 1265 | GCGTATGCAAAGTAAGCTTTCAGGTGC<br>CAGG                         | Mutagenesis primer for M4,<br>dimerization mutation to second<br>aptamer                                                                                                                                     |
| 1266 | CCTGGCACCTGAAAGCTTACTTTGCATA<br>CGC                         | Mutagenesis primer for M4,<br>dimerization mutation to second<br>aptamer                                                                                                                                     |
| 1526 | CATGAAAATATGAGCGAATCCCAGCAA<br>GGGGAGAGAC                   | Mutagenesis primer for M5,<br>leader-linker kink-turn mutation                                                                                                                                               |
| 1527 | GTCTCTCCCCTTGCTGGGATTCGCTCAT<br>ATTTTCATG                   | Mutagenesis primer for M5,<br>leader-linker kink-turn mutation                                                                                                                                               |
| 1284 | GGTGTCTCTGTAATTTTTTGTATG                                    | Mutagenesis primer for M6,<br>terminator mutation                                                                                                                                                            |
| 1285 | CATACAAAAAATTACAGAGAAACACC                                  | Mutagenesis primer for M6,<br>terminator mutation                                                                                                                                                            |
| 1528 | GACCTGACCGAAAATTTTCGGGATACAG<br>GCGC                        | Mutagenesis primer for M7,<br>control mutation to first aptamer                                                                                                                                              |
| 1529 | GCGCCTGTATCCCGAAATTTTCGGTCA<br>GGTC                         | Mutagenesis primer for M7,<br>control mutation to first aptamer                                                                                                                                              |
| 1530 | GAGTGTTTGTGCGGAAGCGCAAACCAC<br>CAAAGG                       | Mutagenesis primer for M8,<br>control mutation to second<br>aptamer                                                                                                                                          |
| 1531 | CCTTTGGTGGTTTGCCTTCCGCACAA<br>ACACTC                        | Mutagenesis primer for M8,<br>control mutation to second<br>aptamer                                                                                                                                          |
| 1444 | CTGACAGCTTCCAAGGAGCTAAAGAGG<br>TCTCCTGTTGATAGATCCAGTAATGACC | Primer for amplifying double<br>terminator construct from<br>pYH213 for appending onto 3'<br>end of erythromycin resistance<br>cassette from pDG1663 for<br>$\Delta gcvT$ - $gcvPB$ recombinant<br>construct |

|      |                                                                      |                                                                                                                                                                                            |
|------|----------------------------------------------------------------------|--------------------------------------------------------------------------------------------------------------------------------------------------------------------------------------------|
| 1445 | GGTCATTACTGGATCTATCAACAGGAGA<br>CCTCTTTAGCTCCTTGGAAGCTGTCAG          | Primer for amplifying double terminator construct from pYH213 for appending onto 3' end of erythromycin resistance cassette from pDG1663 for $\Delta gcvT$ - $gcvPB$ recombinant construct |
| 1446 | GTTTAAACGATACAAATTCCCCGTAGGC<br>GCTAGGGAAAAAATTACGCCCGCCC<br>TGCC    | Primer for appending double terminator construct onto 3' end of erythromycin resistance cassette from pDG1663 for $\Delta gcvT$ - $gcvPB$ recombinant construct; use with primer 681       |
| 1652 | CCCTAGCGCCTACGGGGAATTTGTATC<br>GTTTAAACATAAAAACAGCTGTCTACCA<br>GACAG | Primer for amplifying 3'-500 bp region of $\Delta gcvT$ - $gcvPB$ recombinant construct                                                                                                    |
| 1653 | CGAAAACGGCTCTATGACCTTG                                               | Primer for amplifying 3'-500 bp region of $\Delta gcvT$ - $gcvPB$ recombinant construct                                                                                                    |
| 1654 | GAATCAGTTTATCAAACACTGTCGGG                                           | Primer for confirming genomic integration of $\Delta gcvT$ - $gcvPB$ recombinant construct; use with primer 1046                                                                           |
| 1671 | AAAGGAGAGAACCGCTATCTGC                                               | Primer for qRT-PCR targeting the $gcvT$ coding region                                                                                                                                      |
| 1672 | AATCTGCACATCACCTGCTG                                                 | Primer for qRT-PCR targeting the $gcvT$ coding region                                                                                                                                      |
| 1546 | TTTTACTTCGTGACGGCGGT                                                 | Primer for qRT-PCR targeting $nifU$ , the normalization control                                                                                                                            |
| 1547 | TTGTTGAACTTGGGCAGCTG                                                 | Primer for qRT-PCR targeting $nifU$ , the normalization control                                                                                                                            |
